# Supplementary material for: Programme zur Förderung emotionaler Kompetenzen in der mittleren Kindheit
Source: Atypon-hosted journal article supplement (doi:10.1024/1010-0652/a000371), 2023-09-26
Supplement: 1010-0652_a000371_esm1.pdf [file 1010-0652_a000371_esm1.pdf]

## Elektronisches Supplement 1: Ausgeschlossene Programme

Nach der Analyse der Volltexte wurden die Programme *Get lost Mr. Scary* (Ruocco et al., 2018), *Medienhelden* (Schultze-Krumbholz et al., 2014), *Klasse Kinder Spiel* (Hillenbrand & Pütz, 2008) und das Programm *ReSi* (zitiert nach Feldmann et al., 2018) ausgeschlossen, da diese sich im weiteren Sinne auf die Prävention von Angst, Cybermobbing, sexualisierte Gewalt oder auf die Verbesserung von Verhaltensproblemen und dem Klassenklima fokussieren, statt auf die Förderung der emotionalen Entwicklung. Ferner wurden die Programme *Anxiety Action Plan* (Ginsburg et al., 2016), *Families Coping with Economic Strain Program* (zitiert nach Raviv & Wadsworth, 2010) und *FRIENDS for Life* (zitiert nach Gallegos et al., 2012) ausgeschlossen, da diese auf eine indizierte Prävention bei erhöhter Ängstlichkeit, geringer Selbstwirksamkeitserwartung oder auf Waisenkinder abzielen. Auch das Programm *Lubo aus dem All* konnte nicht in die Analysen inkludiert werden, da die Datenlage zur globalen Prävention dürftig war und die Wirksamkeit in zwei Dissertationen lediglich für Risikogruppen (zuvor diagnostizierte Defizite in emotionaler oder kognitiver Kompetenz) bestätigt werden konnte (Hövel, 2014; Hens, 2010). Die Programme *Huckepack* (zitiert nach Laux, 2015) und *Balu und Du* (zitiert nach Schlüter et al., 2013) wurden von der weiteren Analyse ausgeschlossen, da es sich um indizierte Präventionen und in erster Linie um mentorenbasierte Projekte für Vorschulkinder handelt.

## Quellen

- Feldmann, J., Storck, C. & Pfeffer, S. (2018). Resi: Evaluation of a program for competency training and prevention of sexual abuse in kindergarten. *Praxis der Kinderpsychologie und Kinderpsychiatrie*, 67, 720–735. <https://doi.org/10.13109/prkk.2018.67.8.720>
- Hens, S. (2010). *Entwicklung, Durchführung und Evaluation eines universellen Trainingsprogramms zur Förderung der sozial-emotionalen Kompetenzen in der Eingangsstufe*. Dissertation, Universität Köln.
- Hillenbrand, C. & Pütz, K. (2008) *Das Klasse Kinder Spiel. Spielerisch Verhaltensregeln lernen*. Hamburg: Edition Körber Stiftung.
- Hövel, D. C. (2014). *Adaption und Evaluation des Präventionsprogramms "Lubo aus dem All!" für Kinder mit hohen Risikobelastungen*. Dissertation, Universität Oldenburg.
- Gallegos, J., Rodriguez, A., Gomez, G., Rabelo, M. & Gutierrez, M. F. (2012). The Friends for Life Program for Mexican girls living in an Orphanage: A pilot study. *Behaviour Change*, 29, 1–14. <https://doi.org/10.1017/bec.2012.8>
- Ginsburg, G. S., Drake, K. L., Winegrad, H., Fothergill, K. & Wissow, L. S. (2016). An open trial of the Anxiety Action Plan (AxAP): A brief pediatrician-delivered intervention

for anxious youth. *Child & Youth Care Forum*, 45, 19–32.

<https://doi.org/10.1007/s10566-015-9320-3>

Raviv, T. & Wadsworth, M. E. (2010). The efficacy of a pilot prevention program for children and caregivers coping with economic strain. *Cognitive Therapy and Research*, 34, 216–228. <https://doi.org/10.1007/s10608-009-9265-7>

Ruocco, S., Freeman, N. C. & McLean, L. A. (2018). Learning to cope: A CBT evaluation exploring self-reported changes in coping with anxiety among school children aged 5–7 years. *Educational and Developmental Psychologist*, 35, 67–87.  
<https://doi.org/10.1017/edp.2018.8>

Schlüter, M., Müller-Kohlenberg, H. & Schomborg, N. (2013). Projektvorstellung: Balu und Du. *Unsere Jugend*, 65, 429–435. <http://dx.doi.org/10.2378/uj2013.art40d>

Schultze-Krumbholz, A., Zagorscak, P., Wölfer, R. & Scheithauer, H. (2014). Das Medienhelden-Programm zur Förderung von Medienkompetenz und Prävention von Cybermobbing: Konzept und Ergebnisse aus der Evaluation. *Praxis der Kinderpsychologie und Kinderpsychiatrie*, 63, 379–394.  
<https://doi.org/10.13109/prkk.2014.63.5.379>
