# Supplementary material for: Programme zur Förderung emotionaler Kompetenzen in der mittleren Kindheit
Source: Atypon-hosted journal article supplement (doi:10.1024/1010-0652/a000371), 2023-09-26
Supplement: 1010-0652_a000371_esm2.pdf [file 1010-0652_a000371_esm2.pdf]

## Elektronisches Supplement 2: Tabelle

Zusammenfassung der eingeschlossenen Programme und Interventionen zur Förderung der emotionalen Kompetenz bei Kindern

| Programmname                                                              | Alter | Sitzungen<br>(Dauer)   | Zielsetzung                                                                                       | Inhalt/ Übungen                                                                                                                                                                                                                                                                                                                                                  |
|---------------------------------------------------------------------------|-------|------------------------|---------------------------------------------------------------------------------------------------|------------------------------------------------------------------------------------------------------------------------------------------------------------------------------------------------------------------------------------------------------------------------------------------------------------------------------------------------------------------|
| Friedensstifter-<br>Training                                              | 9–11  | 13<br>(à 45min)        | Förderung des konstruktiven<br>Umgangs mit den eigenen<br>Emotionen, Prävention von<br>Aggression | Gefühle auf Karten erkennen; Pantomimisches Spiel, um<br>Gefühle auszudrücken; Bastelanleitung für Gefühlsbarometer;<br>Erarbeitung von Konfliktlösestrategien mit Hilfe von<br>Tiergeschichten; Wutstern: „Was macht mich wütend?“;<br>Arbeitsblatt „Wie behalte ich einen kühlen Kopf?“;<br>Perspektivwechsel: Tausch von Sitzpositionen,<br>Rollenspielkarten |
| Coping Kids<br>Managing Anxiety<br>and Depression<br>program<br>(EMOTION) | 8–12  | 20<br>(à 6h)           | Verbesserung der<br>Emotionsregulation,<br>Prävention von Angst und<br>Depression                 | 3Bs: Zusammenhang von Brain, Body, Behavior;<br>Gedankenblase: Zusammenhang Gedanken und Gefühle; Muck<br>Monster: Umwandlung negativer Gedanken; Experiment<br>Sonnenbrille: verzerrte Wahrnehmung; Gefühlsbarometer;<br>Gefühlsregulierung: gemeinsam Ideen sammeln                                                                                            |
| Emotion-Based<br>Prevention<br>Program (EBP)                              | 4–6   | 20<br>(à 25min)        | Förderung emotionaler<br>Kompetenzen bei<br>Vorschulkindern                                       | Gefühle malen, erkennen, benennen; „Was macht dich<br>traurig?“. Zusammenhang Ereignis und Gefühl; Puppenspiele,<br>Rollenspiel: Kind trösten; Emotionsregulation: sich selbst<br>umarmen, drei tiefe Atemzüge                                                                                                                                                   |
| Emotionsregulation<br>straining (ERT)                                     | 6–10  | 6<br>(à 60–75min)      | Stärkung der<br>Emotionsregulation                                                                | Seelenvogel, Geschichten zum Mitfühlen; Gefühle raten,<br>malen; Brillenexperiment, Rollenspiel; Austobe-Spiele,<br>Traumreise                                                                                                                                                                                                                                   |
| Emotionstraining<br>in der Schule                                         | 10–13 | 11 Module<br>(à 90min) | Förderung emotionaler<br>Kompetenzen                                                              | Ton-Übung, Achtsamkeit; Gefühlsfotos erkennen, Gefühlsquiz;<br>Kunstsprache „Emola“; Strategieregenbogen zu<br>Emotionsregulation; Kurzgeschichten, Rollenspiele,                                                                                                                                                                                                |

|                                                    |       |                 |                                                                                          |                                                                                                                                                                                                                               |
|----------------------------------------------------|-------|-----------------|------------------------------------------------------------------------------------------|-------------------------------------------------------------------------------------------------------------------------------------------------------------------------------------------------------------------------------|
|                                                    |       |                 |                                                                                          | unangenehme Emotionen akzeptieren; Unterstützung durch „Gefühlshelfer“                                                                                                                                                        |
| Faustlos – Gewaltprävention in der Grundschule     | 6–10  | 52<br>(à 45min) | Förderung sozialer und emotionaler Kompetenzen, Gewaltprävention                         | Emotionen erkennen anhand von Bildmaterialien; körperliche und psychische Anzeichen erkennen; Beruhigungs- und Achtsamkeitstechniken; Beispielgeschichten, Rollenspiele; Diskussionsrunden und Transfer des Gelernten“        |
| Friedliches Miteinander in Streitsituationen (FMS) | 6–11  | 3<br>(à 1h)     | Förderung von Emotionsverständnis bei sich selbst und anderen                            | Portraitbilder mit Grundemotionen; Giraffen- versus Wolfssprache: Erlernen von Kommunikationsstilen; Schritte der gewaltfreien Kommunikation erlernen; Eigene emotionale Situationen besprechen, Rollenspiele                 |
| Learn young, learn fair                            | 11–12 | 13<br>(à 1h)    | Umgang mit Emotionen bei Stress                                                          | Psychoedukation/Vermittlung von Emotionswissen; Vermittlung von Problemlösetechniken; Vermittlung von Emotionsregulations- und Copingstrategien                                                                               |
| Mich und Dich verstehen (MUDV)                     | 8–12  | 9<br>(à 4h)     | Emotionales Kompetenztraining                                                            | Wahrnehmung eigener Gefühle: Imaginationen, Gefühlswörter, Gefühlswürfel, Bilder, Übungen Perspektivübernahme; Übungen zum Einfühlungsvermögen; Übungen zur Angst und Stressbewältigung; Entspannungsübungen, Phantasiereisen |
| Mindfulness Based Stress Reduction (MBSR)          | k. B. | 8<br>(à 2.5–3h) | Achtsamkeitstraining zur Stressreduktion                                                 | Psychoedukation/ Vermittlung von Emotionswissen; Achtsamkeits- und Entspannungsübungen: Mindful Breath, Body Scan, Meditation, Regenröhre; Kognitive Methoden: Umstrukturierung, Modelllernen                                 |
| Penn Resiliency Program (PRP)                      | 8–18  | 12<br>(à 90min) | Erlernen von kognitiv-verhaltenstherapeutischen und problemlösungs-bezogenen Fähigkeiten | Erkennen von Emotionen durch Bilder; interaktive Spiele zum Zusammenhang von Gedanken und Gefühlen; Übungen zum Entkatastrophisieren, Rollenspiele; Emotionsregulation durch Entspannungsübungen                              |

|                                                       |                          |                                                   |                                                                                                                                          |                                                                                                                                                                                                                                                                                                                                                                                                 |
|-------------------------------------------------------|--------------------------|---------------------------------------------------|------------------------------------------------------------------------------------------------------------------------------------------|-------------------------------------------------------------------------------------------------------------------------------------------------------------------------------------------------------------------------------------------------------------------------------------------------------------------------------------------------------------------------------------------------|
| PATHS; in Deutschland: Training im Problemlösen (TIP) | 5–12<br>Deutschland: 7–9 | 100<br>(à 20-30min)<br>Deutschland: 201<br>(à 1h) | Förderung sozial-emotionaler Kompetenz, Selbstbeherrschung, Aufbau positiver Beziehungen zu Gleichaltrigen und Problemlösungsfähigkeiten | Wissen über Basisemotionen und komplexe Emotionen; Erkennen von eigenen und Gefühlen anderer Personen; Techniken zum Self-Monitoring: Erstellung von Gefühlsboxen mit Emotionskarten; Emotionsausdruck: Karten in der Schule nutzen, Lehrer/-in nutzt diese ebenfalls; Gefühlsregulierungstechniken mithilfe von Ampelsystem; Gruppen-/Partnerarbeit, Hausaufgaben/Arbeitsblätter               |
| Rational Emotive Education (REE)                      | 6–11                     | 24<br>(à 20–30min)                                | Förderung emotionaler Fähigkeiten, Kognitive Umstrukturierung                                                                            | Lesen von therapeutischen Fabeln; irrationalen Überzeugungen beleuchten, beispielsweise Fabel „Giulia, die Füchsin“: Füchsin mit negativer Selbsteinschätzung, Vermittlung von emotionalem Vokabular; anschließende Diskussion über Inhalt der Fabeln; Umformulierung der dysfunktionalen Gedanken in funktionale Gedanken                                                                      |
| REThink Videospiel                                    | 10–16                    | 7 Level                                           | Videospiel zur Prävention von Defiziten emotionaler Fähigkeiten                                                                          | Unterscheidung zwischen „funktionalen und dysfunktionalen Emotionen“; Zusammenhang zwischen Überzeugungen, Emotionen und Verhaltensreaktionen; Umwandlung irrationaler in rationale Gedanken; Übung zur Entwicklung von Problemlösefähigkeiten, Quiz; Entspannungstechnik: Bauch-Atemübung; „positive Emotionen“ hinsichtlich Mimik, Gestik identifizieren, eigene Emotionen mit anderen teilen |
| Roots of Empathy (ROE)                                | 6–14                     | 27<br>(à 45min)                                   | Förderung sozial-emotionaler Kompetenzen                                                                                                 | Eigene Emotionen wahrnehmen, erkennen und benennen; Emotionen anderer Kinder erkennen, Perspektivübernahme erlernen: regelmäßiger Besuch eines Kleinkindes und seiner Eltern, Wunschbaum für Kleinkind gestalten; Wissen über „gemischte Gefühle“: traurig über verlorenen Zahn, Freude über Besuch der Zahnfee                                                                                 |

|                                       |       |                    |                                                                 |                                                                                                                                                                                                                                                                       |
|---------------------------------------|-------|--------------------|-----------------------------------------------------------------|-----------------------------------------------------------------------------------------------------------------------------------------------------------------------------------------------------------------------------------------------------------------------|
| Soziales Lernen in der Schule         | 7–16  | 16<br>(à 1,5h)     | Erkennen, Verstehen und Regulation von Gefühlen                 | Emotionserkennung mit Hilfe von Fotos; Erkennen von körperlichen Signalen bei Emotionen; Fragebogen über eigene Emotionen, Videographie, Rollenspiele; Gruppendiskussionen zu eigenen Alltagsbeispielen; Emotionsregulationsübungen                                   |
| Unique Minds School Program           | 6–11  | 26-36<br>(à 30min) | Förderung sozial-emotionaler Kompetenzen                        | Gefühle erkennen und benennen, Puppen- oder Rollenspiel; Diskussionsrunden; Erarbeitung von Problemlösungen zur Stressbewältigung, Strategien zur Gefühlsregulierung, Musik und Bewegungsübungen; Erkennen des Zusammenhangs von Gedanken, Gefühlen, Körperreaktionen |
| Verhaltenstraining in der Grundschule | 6–11  | 26<br>(à 45–90min) | Förderung der sozialen, emotionalen und moralischen Entwicklung | Wissen und Erkennen von Emotionen; Erstellung eines Wutkontrollplans; praktisches Einüben von Wutkontrollstrategien; Abschätzen von Handlungskonsequenzen; Finden von Handlungsalternativen                                                                           |
| Emotion Detectives Prevention Program | 7–12  | 15<br>(à 45min)    | Universelle Vorsorge von Emotionalen Störungen                  | Kognitive Umstrukturierung; Stimuli nutzen; Situationen aus anderen Perspektiven sehen; Vorsorge zur Vermeidung von emotionaler Vermeidung; Steigerung der Verhaltensaktivierung und des Erlebens emotionaler Situationen, ohne sich auf Vermeidung einzulassen;      |
| Strong Minds                          | 15–18 | 16<br>(à 30min)    | Förderung mentaler Gesundheit durch Akzeptanz                   | Persönliche Werte; Taten entsprechend der Werte; Kontakt mit dem Moment; Selbstbeobachtung; Akzeptanz von Emotionen; Negative Gedanken mit innerem Dialog verbinden                                                                                                   |
