# Supplementary material for: Programme zur Förderung emotionaler Kompetenzen in der mittleren Kindheit
Source: Atypon-hosted journal article supplement (doi:10.1024/1010-0652/a000371), 2023-09-26
Supplement: 1010-0652_a000371_esm3.pdf [file 1010-0652_a000371_esm3.pdf]

### Elektronisches Supplement 3: Tabelle

*Feinanalyse: Erhebungsmethode der emotionalen Variablen*

|                                      | $N$   | $k$ | $d_m$ | $d_w$ | $\sigma_p^2$ |
|--------------------------------------|-------|-----|-------|-------|--------------|
| Selbsteinschätzung                   | 15312 | 30  | 0.32  | 0.26  | 0.0244       |
| Lehrperson                           | 9324  | 21  | 0.36  | 0.26  | 0.0269       |
| Eltern                               | 5397  | 10  | 0.18  | 0.26  | 0.0409       |
| Leistungstest                        | 2432  | 10  | 0.67  | 0.45  | 0.1575       |
| Interview/Verhaltens-<br>beobachtung | 621   | 3   | 0.66  | 0.71  | 0.0158       |
