# Supplementary material for: Programme zur Förderung emotionaler Kompetenzen in der mittleren Kindheit
Source: Atypon-hosted journal article supplement (doi:10.1024/1010-0652/a000371), 2023-09-26
Supplement: 1010-0652_a000371_esm4.pdf [file 1010-0652_a000371_esm4.pdf]

#### Elektronisches Supplement 4: Wirksamkeit der Programme im weiteren Sinne

In einem letzten Schritt sollten auch alle Effekte im weiteren Sinne überprüft werden, die in den  $k=49$  Studien berichtet wurden. In  $k=43$  Studien wurden Effekte zu sozialen Kompetenzen (Interaktion mit Gleichaltrigen, Kommunikationsfähigkeiten, Beziehungsqualität zu Eltern etc.), Gesundheit (Depressionen, psychisches Wohlbefinden, klinisch relevantes Ungleichgewicht etc.) und/oder kognitive Kompetenzen (Schulleistungen, Konzentration, Rationale Gedankenmuster etc.) berichtet. Weitere Ergebnisse, wie beispielsweise körperliche Bewegung, körperliche Beschwerden oder delinquentes Verhalten wurden aufgrund mangelnder Datenlage nicht berücksichtigt. Die Effekte wurden einer Subgruppe zugeordnet und anschließend auf einen Effekt pro Studie und in der jeweiligen Subgruppe gemittelt. Es mussten aus der Analyse drei Ausreißer entfernt werden, einer für die Gesundheit und zwei für die kognitiven Kompetenzen, was die Homogenität erheblich verbesserte. Die Ergebnisse dazu sind Tabelle 6 zu entnehmen.

#### Tabelle

*Wirksamkeit von Programmen auf weitere Variablen*

|                       | $N$   | $k$ | $d_m$ | $d_w$ | $\sigma_p^2$ |
|-----------------------|-------|-----|-------|-------|--------------|
| Soziale Kompetenzen   | 19478 | 27  | 0.28  | 0.11  | 0.0587       |
| Gesundheit            | 11057 | 26  | 0.33  | 0.25  | 0.0417       |
| Kognitive Kompetenzen | 5273  | 10  | 0.37  | 0.41  | 0.0556       |

*Anmerkungen.* Abkürzungen:  $N$  = Stichprobengröße über alle einbezogenen Studien hinweg,  $k$  = Anzahl einbezogener Studien,  $d_m$  = mittlere Effektstärke  $d$ ,  $d_w$  = an der Stichprobengröße gewichtete mittlere Effektstärke  $d$ .

Entgegen der Erwartung zeigen sich die kleinsten mittleren Effekte für soziale Kompetenzen ( $d = 0.11$  und  $d = 0.28$ ), da hier eine hohe Streuung der Effekte sowie der Stichprobengrößen vorlag. Etwas höhere mittlere Effekte zeigen sich für die Gesundheitsmaße ( $d = 0.25$  und  $d = 0.33$ ). Die höchsten Effekte zeigen sich für die Entwicklung kognitiver Kompetenzen ( $d = 0.37$  und  $d = 0.41$ ). Alle Homogenitätswerte erweisen sich als weniger zufriedenstellend. Demnach sollten auch diese Ergebnisse zukünftig mit Blick auf weitere mögliche Untergruppen interpretiert werden.
