# Supplementary material for: Programme zur Förderung emotionaler Kompetenzen in der mittleren Kindheit
Source: Atypon-hosted journal article supplement (doi:10.1024/1010-0652/a000371), 2023-09-26
Supplement: 1010-0652_a000371_esm5.pdf [file 1010-0652_a000371_esm5.pdf]

## Elektronisches Supplement 5: Tabelle

### Wirksamkeit spezifischer Programme im Vergleich

| <i>Programmname</i>            | <i>N</i> | <i>k</i> | <i>d<sub>m</sub></i> | <i>d<sub>w</sub></i> | <i>σ<sub>p</sub><sup>2</sup></i> |
|--------------------------------|----------|----------|----------------------|----------------------|----------------------------------|
| PATHS                          | 10560    | 6        | 0.38                 | 0.66                 | 0.2880                           |
| FMS                            | 466      | 2        | 0.67                 | 0.65                 | <b>0.0091</b>                    |
| REE                            | 2792     | 2        | 0.40                 | 0.57                 | 0.0395                           |
| PRP                            | 2401     | 6        | 0.33                 | 0.46                 | 0.1197                           |
| Faustlos                       | 752      | 4        | 0.29                 | 0.45                 | 0.1171                           |
| MBSR                           | 2093     | 2        | 0.33                 | 0.41                 | <b>0.0097</b>                    |
| Unique Minds School Program    | 134      | 2        | 0.41                 | 0.40                 | <b>&lt;0</b>                     |
| Emotionstraining in der Schule | 1090     | 3        | 0.41                 | 0.38                 | 0.0737                           |
| EBP                            | 423      | 2        | 0.35                 | 0.33                 | 0.0257                           |
| EDPP                           | 335      | 2        | 0.23                 | 0.24                 | <b>&lt;0</b>                     |
| EMOTION                        | 1474     | 2        | 0.19                 | 0.21                 | <b>0.0098</b>                    |
| ROE                            | 1652     | 4        | 0.24                 | 0.20                 | <b>0.0038</b>                    |

*Anmerkungen.* Wirksamkeit von Programmen zur Steigerung emotionaler Kompetenzen, sortiert nach mittlerer und an Stichprobe gewichteter Effekthöhe; Abkürzungen:  $d_m$  = mittlere Effektstärke  $d$ ,  $d_w$  = an der Stichprobengröße gewichtete mittlere Effektstärke  $d$ ; Geschätzte Populationsabweichungen für Kategorien, die wesentlich kleiner sind als null ( $>0.01$ ) bzw. als die für alle Effekte zusammen (was auf eine größere Homogenität der Ergebnisse hinweist), sind fett gedruckt.
