# Supplementary material for: Programme zur Förderung emotionaler Kompetenzen in der mittleren Kindheit
Source: Atypon-hosted journal article supplement (doi:10.1024/1010-0652/a000371), 2023-09-26
Supplement: 1010-0652_a000371_esm6.pdf [file 1010-0652_a000371_esm6.pdf]

## Elektronisches Supplement 6: Abbildung

*Inhaltliche Moderatorvariablen zur Erklärung programmspezifischer Effekte*

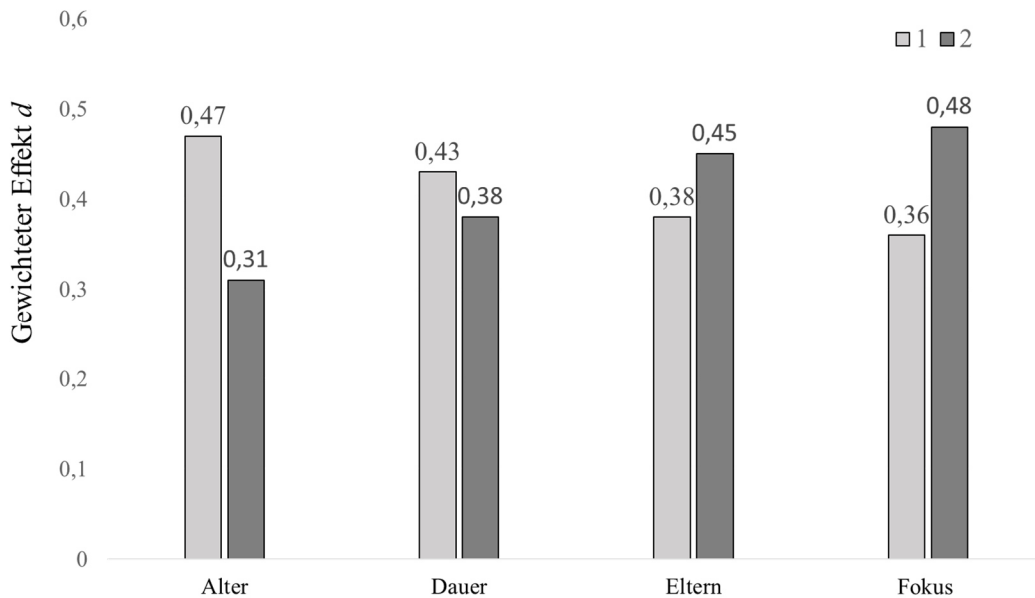

*Anmerkungen.* Abgebildet ist der an der Stichprobengröße gewichtete Effekt  $d$  entlang der y-Achse und die Moderatorvariablen entlang der x-Achse. Moderatorvariablen wurden wie folgt kodiert: Alter (1=Zielgruppe unter 10 Jahre, 2=über 10 Jahre alt), Dauer (1=unter 20 Stunden, 2=über 20 Stunden), Eltern (1=nicht einbezogen, 2=teilweise in Intervention einbezogen), Fokus (1=nicht primär auf die emotionale Entwicklung ausgerichtet, 2=auf die emotionale Entwicklung ausgerichtet).
